# Supplementary material
Source: MDPI journal article supplement (https://www.mdpi.com/2311-7524/9/2/247)
Supplement: s1 [file s1]

Table S1. Cultivar effects on plant growth parameters of *Zinnia marylandica* ‘Double Zahara Fire Improved’ (D.Za.F.I) and *Zinnia elegans* ‘Zinnita Scarlet’ (Zi.S)

| NaCl (mM)                 | D.Za.F.I   | Zi.S       | LSD               |
|---------------------------|------------|------------|-------------------|
| Shoot length (cm)         | 12.3±2.3   | 12.0±2.7   | --- <sup>NS</sup> |
| Branch number (unit)      | 13.3±1.79a | 7.5±1.61b  | 0.450***          |
| Branch length (cm)        | 8.30±1.71a | 6.61±2.06b | 0.316***          |
| Stem diameter (mm)        | 4.86±0.3a  | 4.65±0.6b  | 0.199*            |
| Root collar diameter (mm) | 5.65±0.4a  | 4.53±0.8b  | 0.181***          |
| Leaf width (mm)           | 26.3±3.8b  | 36.7±5.6a  | 1.297***          |
| Leaf length (mm)          | 86.9±9.9a  | 64.8±9.4b  | 2.277***          |
| Root fresh weight (g)     | 5.89±0.9   | 4.72±2.7   | --- <sup>NS</sup> |
| Root dry weight (g)       | 0.368±0.2  | 0.339±0.6  | --- <sup>NS</sup> |
| Shoot fresh weight (g)    | 20.08±6.6a | 15.54±6.5b | 1.800***          |
| Shoot dry weight (g)      | 2.149±0.8a | 1.812±0.6b | 0.291*            |

\*p<0.05, \*\*p<0.01, \*\*\*p<0.001, ---<sup>NS</sup>: nonsignificant

Table S2. Salt stress effects on plant growth parameters of *Zinnia marylandica* ‘Double Zahara Fire Improved’ (D.Za.F.I) and *Zinnia elegans* ‘Zinnita Scarlet’ (Zi.S)

| NaCl (mM)              | 0           | 50          | 100         | 150          | 200         | LSD      |
|------------------------|-------------|-------------|-------------|--------------|-------------|----------|
| Shoot length (cm)      | 15.2±1.8A   | 13.1±1.2B   | 12.1±2.4C   | 10.3±1.0D    | 10.0±0.8D   | 0.804*** |
| Branch number (unit)   | 11.8±3.7A   | 11.6±3.5A   | 10.1±3.3B   | 9.5±2.8BC    | 9.2±2.7C    | 0.712*** |
| Branch length (cm)     | 9.70±3.7A   | 8.62±3.5B   | 7.60±3.3C   | 5.94±2.8D    | 5.39±2.7E   | 0.500*** |
| Stem diameter (mm)     | 5.21±0.3A   | 4.90±0.3BC  | 4.91±0.2AB  | 4.59±0.2C    | 4.14±0.6D   | 0.315*** |
| Root collar diam. (mm) | 5.90±0.4A   | 5.24±0.6B   | 5.10±0.7BC  | 4.88±0.5C    | 4.33±1.0D   | 0.286*** |
| Leaf width (mm)        | 35.9±6.7A   | 33.7±6.6B   | 30.8±7.0C   | 29.3±5.5CD   | 27.8±6.9D   | 2.050*** |
| Leaf length (mm)       | 87.1±15A    | 79.8±14B    | 74.0±13C    | 69.0±13D     | 69.6±10D    | 3.601*** |
| Root fresh weight (g)  | 7.28±2.4A   | 6.07±1.6AB  | 5.00±1.6BC  | 4.69±0.8BC   | 3.51±1.6C   | 1.867**  |
| Root dry weight (g)    | 0.538±0.84A | 0.372±0.08B | 0.340±0.08B | 0.299±0.04BC | 0.220±0.09C | 0.117*** |
| Shoot fresh weight (g) | 27.75±4A    | 21.04±2B    | 15.87±5C    | 13.45±2CD    | 10.95±3D    | 2.846*** |
| Shoot dry weight (g)   | 3.105±0.8A  | 2.053±0.2B  | 1.867±0.4BC | 1.561±0.1CD  | 1.318±0.3D  | 0.461*** |

\*p<0.05, \*\*p<0.01, \*\*\*p<0.001, ---<sup>NS</sup>: nonsignificant

Table S3 Cultivar effects on stomatal parameters of *Zinnia marylandica* ‘Double Zahara Fire Improved’ (D.Za.F.I) and *Zinnia elegans* ‘Zinnita Scarlet’ (Zi.S)

| Leaf Side | Stomatal Parameters | D.Za.F.I  | Zi.S      | LSD       |
|-----------|---------------------|-----------|-----------|-----------|
| Abaxial   | Stoma width         | 24.9±2.2a | 20.4±2.4b | 0.721***  |
|           | Stoma length        | 44.3±4.2a | 31.9±3.7b | 1.253***  |
|           | Stoma density       | 130±30b   | 201±35a   | 10.649*** |
| Adaxial   | Stoma width         | 25.9±3.5a | 19.2±2.3b | 1.831***  |
|           | Stoma length        | 49.1±3.8a | 32.3±3.5b | 1.025***  |
|           | Stoma density       | 70±16b    | 155±26a   | 7.870***  |

Table S4. Cultivar effects on stomatal parameters of *Zinnia marylandica* ‘Double Zahara Fire Improved’ (D.Za.F.I) and *Zinnia elegans* ‘Zinnita Scarlet’ (Zi.S)

| Leaf Side | Stomatal Parameters | NaCl (mM) |          |          |         |          | LSD       |
|-----------|---------------------|-----------|----------|----------|---------|----------|-----------|
|           |                     | 0         | 50       | 100      | 150     | 200      |           |
| Abaxial   | Stoma width         | 23.4±5A   | 22.2±3B  | 23.5±2A  | 22.2±3B | 22.1±4B  | 1.140*    |
|           | Stoma length        | 39.2±8A   | 38.3±7AB | 39.7±5A  | 36.8±8B | 36.5±10B | 1.981**   |
|           | Stoma density       | 187±53A   | 187±64A  | 159±23B  | 159±28B | 135±55C  | 16.837*** |
| Adaxial   | Stoma width         | 21.6±4B   | 21.4±2B  | 23.5±6A  | 24.6±5A | 21.6±5B  | 1.314***  |
|           | Stoma length        | 38.6±9B   | 39.5±8B  | 43.0±11A | 43.2±9A | 39.0±11B | 1.620***  |
|           | Stoma density       | 130±53A   | 122±58A  | 108±48B  | 107±53B | 94±36C   | 12.444*** |

Table S5. Cultivar effects on leaf anatomical parameters of *Zinnia marylandica* ‘Double Zahara Fire Improved’ (D.Za.F.I) and *Zinnia elegans* ‘Zinnita Scarlet’ (Zi.S)

| Leaf Parameters | D.Za.F.I  | Zi.S      | LSD               |
|-----------------|-----------|-----------|-------------------|
| LT (μm)         | 265.8±24b | 304.9±45a | 8.048***          |
| LAbeC (μm)      | 27.9±6    | 26.2±6    | --- <sup>NS</sup> |
| LPL (μm)        | 62.4±11b  | 77.3±8a   | 1.711***          |
| WSPC (μm)       | 15.2±2.9b | 20.6±3.9a | 0.975***          |
| LAdeC (μm)      | 15.5±4.0b | 17.4±6.2a | 1.167**           |

LT: Leaf Thickness, LAbeC: Length of abaxial epidermal cells, LPL: Length of palisade layer, WSPC: Width of spongy parenchyma cells, LAdeC: Length of adaxial epidermal cells

\*\*p<0.01      \*\*\*p<0.001      ---<sup>NS</sup>:nonsignificant

Table S6. Salt stress effects on leaf anatomical parameters of *Zinnia marylandica* ‘Double Zahara Fire Improved’ (D.Za.F.I) and *Zinnia elegans* ‘Zinnita Scarlet’ (Zi.S)

| Parameters | NaCl (mM) |            |           |           |           | LSD       |
|------------|-----------|------------|-----------|-----------|-----------|-----------|
|            | 0         | 50         | 100       | 150       | 200       |           |
| LT (μm)    | 316.3±51A | 286.8±20BC | 297.8±28B | 274.3±48C | 251.3±27D | 12.726*** |
| LAbeC (μm) | 23.0±5D   | 24.3±5CD   | 33.3±6A   | 28.3±4B   | 26.3±5BC  | 2.741***  |
| LPL (μm)   | 78.5±8A   | 72.6±6B    | 70.1±14B  | 67.2±16C  | 61.0±9D   | 2.706***  |
| WSPC (μm)  | 19.7±4A   | 17.8±3BC   | 19.0±7AB  | 16.8±3CD  | 16.0±4D   | 1.542***  |
| LAdeC (μm) | 13.5±5B   | 16.7±5A    | 18.5±5A   | 16.9±6A   | 16.7±6A   | 1.846***  |

LT: Leaf Thickness, LAbeC: Length of abaxial epidermal cells, LPL: Length of palisade layer, WSPC: Width of spongy parenchyma cells, LAdeC: Length of adaxial epidermal cells \*\*\*p<0.001

Table S7. Cultivar effects on ion leakage, loss of turgidity, proline content and photosynthetic pigments of *Zinnia marylandica* ‘Double Zahara Fire Improved’ (D.Za.F.I) and *Zinnia elegans* ‘Zinnita Scarlet’ (Zi.S)

| NaCl (mM)                              | D.Za.F.I   | Zi.S       | LSD               |
|----------------------------------------|------------|------------|-------------------|
| Ion leakage (%)                        | 34.8b      | 45.0a      | 2.710***          |
| Loss of turgor (%)                     | 17±8       | 15±9       | --- <sup>NS</sup> |
| Prolin content mg/g FW                 | 11.19±6.3a | 9.33±5.3b  | 1.200***          |
| Minimum Fluorescence (F <sub>0</sub> ) | 252±19b    | 281±25a    | 4.980***          |
| Chlorophyll-a                          | 1.684±0.2a | 1.178±0.6b | 0.210***          |
| Chlorophyll-b                          | 0.603±0.0a | 0.515±0.2b | 0.065**           |
| Total Chlorophyll                      | 2.559±0.2a | 1.922±0.9b | 0.300***          |
| Total Carotenoid                       | 0.568±0.1  | 0.508±0.2  | --- <sup>NS</sup> |

\*p<0.05, \*\*p<0.01, \*\*\*p<0.001, ---<sup>NS</sup>: nonsignificant

Table S8 Salt stress effects on ion leakage, loss of turgidity, proline content and photosynthetic pigments of *Zinnia marylandica* ‘Double Zahara Fire Improved’ (D.Za.F.I) and *Zinnia elegans* ‘Zinnita Scarlet’ (Zi.S)

| NaCl (mM)                  | 0          | 50          | 100          | 150         | 200        | LSD      |
|----------------------------|------------|-------------|--------------|-------------|------------|----------|
| Ion leakage (%)            | 26.8±2D    | 30.2±4D     | 41.6±11C     | 46.7±7B     | 54.2±9A    | 4.285*** |
| Loss of turgor (%)         | 4.5±3C     | 12.7±4B     | 13.7±6B      | 22.6±4A     | 26.6±4A    | 4.430*** |
| Prolin content             | 3.41±0.4E  | 5.44±1.9D   | 11.45±2.1C   | 13.78±1.0B  | 17.73±4.0A | 1.898*** |
| Minimum Fluorescence (Fo’) | 278±37A    | 265±27B     | 270±24BC     | 259±22C     | 259±15C    | 7.873*** |
| Chlorophyll-a              | 1.722±0.2A | 1.571±0.3AB | 1.440±0.5ABC | 1.274±0.7BC | 1.145±0.6C | 0.332*   |
| Chlorophyll-b              | 0.673±0.1A | 0.606±0.1AB | 0.531±0.1BC  | 0.525±0.2BC | 0.459±0.2C | 0.102**  |
| Total Chlorophyll          | 2,696±0.3A | 2,449±0.3AB | 2,216±0.6BC  | 2,035±0.9BC | 1,806±0.8C | 0.054**  |
| Total Carotenoid           | 0.659±0.1A | 0.571±0.1AB | 0.517±0.1B   | 0.487±0.2B  | 0.458±0.1B | 0.118*   |

\*p<0.05, \*\*p<0.01, \*\*\*p<0.001, ---<sup>NS</sup>: nonsignificant

Table S9. Cultivar effects on plant nutrient content in roots and aerial parts of *Zinnia marylandica* ‘Double Zahara Fire Improved’ (D.Za.F.I) and *Zinnia elegans* ‘Zinnita Scarlet’ (Zi.S)

| Plan Nutrient | Root       |            |                   | Aerial Part |            |                   |
|---------------|------------|------------|-------------------|-------------|------------|-------------------|
|               | D.Za.F.I   | Zi.S       | LSD               | D.Za.F.I    | Zi.S       | LSD               |
| P             | 0.66±0.1a  | 0.50±0.2b  | 0.102**           | 0.75±0.04b  | 1.10±0.13a | 0.070***          |
| K             | 1.43±0.8   | 1.14±0.6   | --- <sup>NS</sup> | 5.86±0.6a   | 4.61±2.5b  | 0.544***          |
| Ca            | 0.30±0.06b | 0.50±0.18a | 0.092***          | 0.93±0.3a   | 0.68±0.2b  | 0.106***          |
| Mg            | 1.07±0.29  | 0.98±0.37  | --- <sup>NS</sup> | 1.78±0.2    | 1.92±0.2   | --- <sup>NS</sup> |
| Na            | 1.95±0.4   | 1.96±0.8   | --- <sup>NS</sup> | 1.28±1.2b   | 2.27±1.7a  | 0.470***          |
| Na/K          | 2.19±1.9   | 2.58±1.5   | --- <sup>NS</sup> | 0.23±0.2b   | 0.49±0.6a  | 0.117***          |
| Na/Ca         | 6.58±1.7a  | 4.33±1.8b  | 1.346**           | 1.26±1.0b   | 2.86a±2.1  | 0.561***          |
| Cl            | 1.2±0.3    | 1.4±0.5    | --- <sup>NS</sup> | 2.7±1.1     | 3.0±1.3    | --- <sup>NS</sup> |
| Fe            | 237±61     | 245±74     | --- <sup>NS</sup> | 188±52a     | 144±12b    | 27.377**          |
| Cu            | 40.6±2.2b  | 51.1±13.1a | 7.241**           | 42.8±3.8a   | 39.9±3.8b  | 2.746*            |
| Mn            | 25.8±7.3b  | 58.1±24a   | 15.015***         | 230±32      | 249±46     | --- <sup>NS</sup> |
| Zn            | 146±41a    | 90±13b     | 24.697***         | 172±21      | 187±56     | --- <sup>NS</sup> |

\*p<0.05, \*\*p<0.01, \*\*\*p<0.001, ---<sup>NS</sup>: nonsignificant

Table S10. Salt stress effects on plant nutrient elements in root and aerial parts of *Zinnia marylandica* ‘Double Zahara Fire Improved’ (D.Za.F.I) and *Zinnia elegans* ‘Zinnita Scarlet’ (Zi.S)

| Tissue      | NaCl (mM) | P                 | K                 | Ca                | Mg                | Na        | Na/K              | Na/Ca             | Cl        | Fe                | Cu                |
|-------------|-----------|-------------------|-------------------|-------------------|-------------------|-----------|-------------------|-------------------|-----------|-------------------|-------------------|
| Root        | 0         | 0.57±0.1          | 1.68±0.5A         | 0.29±0.1          | 1.46±0.3A         | 1.11±0.3B | 0.76±0.5          | 4.09±1.7          | 0.8±0.2C  | 258±76            | 42.4±5            |
|             | 50        | 0.58±0.1          | 1.80±0.9A         | 0.35±0.1          | 1.21±0.2AB        | 2.14±0.2A | 1.55±0.9          | 6.52±2.2          | 1.1±0.2BC | 274±62            | 49.2±17           |
|             | 100       | 0.60±0.2          | 0.80±0.6B         | 0.43±0.1          | 0.94±0.3BC        | 2.22±0.4A | 3.65±1.6          | 5.49±1.9          | 1.5±0.2AB | 257±69            | 43.3±6            |
|             | 150       | 0.65±0.2          | 1.35±0.6AB        | 0.41±0.1          | 0.83±0.2C         | 2.20±0.3A | 2.89±1.5          | 5.72±1.2          | 1.4±0.1AB | 211±68            | 43.4±7            |
|             | 200       | 0.50±0.2          | 0.80±0.3B         | 0.51±0.3          | 0.68±0.4C         | 2.10±0.8A | 3.10±2.0          | 5.47±2.8          | 1.8±0.4A  | 204±44            | 51.1±13           |
|             | LSD       | --- <sup>NS</sup> | 0.781*            | --- <sup>NS</sup> | 0.308***          | 0.614**   | --- <sup>NS</sup> | --- <sup>NS</sup> | 0.419**   | --- <sup>NS</sup> | --- <sup>NS</sup> |
| Aerial Part | 0         | 0.89±0.1          | 4.70±1.2          | 0.520.1C          | 1.73±0.2          | 0.24±0.0C | 0.06±0.0c         | 0.47±0.1b         | 1.1±0.2D  | 174±40            | 42.4±5            |
|             | 50        | 0.97±0.2          | 5.57±0.8          | 0.790.3B          | 1.87±0.3          | 0.65±0.4C | 0.13±0.1c         | 1.01±0.7b         | 2.4±0.6C  | 166±30            | 40.9±4            |
|             | 100       | 0.97±0.3          | 5.28±3.9          | 0.77±0.1B         | 1.87±0.2          | 1.95±1.8B | 0.42±0.4b         | 2.84±2.8a         | 3.0±0.5BC | 157±15            | 43.4±5            |
|             | 150       | 0.91±0.2          | 5.21±0.9          | 0.92±0.2AB        | 1.91±0.1          | 2.79±1.0A | 0.57±0.3ab        | 3.24±1.6a         | 3.6±1.1AB | 147±8             | 39.4±2            |
|             | 200       | 0.90±0.2          | 5.41±1.4          | 1.03±0.2A         | 1.89±0.3          | 3.22±0.9A | 0.61±0.5a         | 3.15±0.8a         | 4.0±0.5A  | 186±82            | 40.6±3            |
|             | LSD       | --- <sup>NS</sup> | --- <sup>NS</sup> | 1.167***          | --- <sup>NS</sup> | 0.744***  | 0.183***          | 0.889***          | 0.802***  | --- <sup>NS</sup> | --- <sup>NS</sup> |

\*p<0.05, \*\*p<0.01, \*\*\*p<0.001, ---<sup>NS</sup>: nonsignificant
